# Supplementary material for: GPS-R L1 interference signal processing for soil moisture estimation: an experimental study
Source: Springer Nature journal article supplement (doi:10.1186/1687-6180-2014-107), 2014-07-11

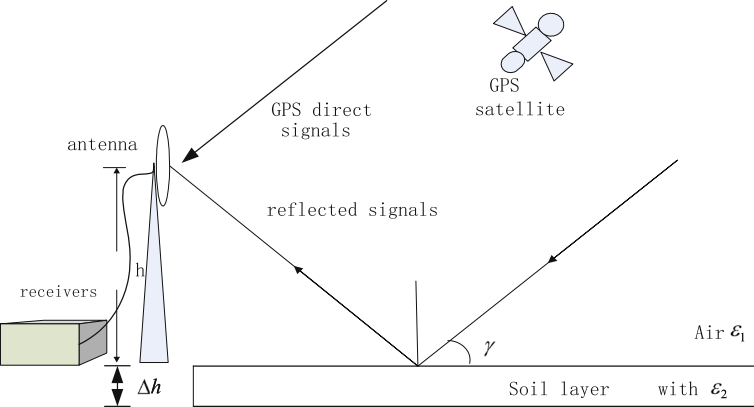

Supplement: 13634_2013_675_MOESM1_ESM.pdf [file 13634_2013_675_MOESM1_ESM.pdf]
